# Supplementary material
Source: publisher figshare collection journal article supplement (https://sage.figshare.com/ndownloader/files/18615791)
Supplement: Supplementary file 1 [file 18615791]

**Supplemental file C. Hierarchical linear regression results for SDM** knowledge

| **Variable** | **β** | **Standard Error** | ***t*** | **p-value** |
| --- | --- | --- | --- | --- |
| *Step 1* |  |  |  |  |
| Age | .07 | .02 | 3.79 | .00 |
| Gender | -.23 | .12 | -1.96 | .05 |
| Race_US | .07 | .05 | 1.26 | .21 |
| Race_UK | -.06 | .08 | -.71 | .48 |
| Race_Ne | -.37 | .24 | -1.51 | .13 |
| Hispanic | -.13 | .13 | -1.02 | .31 |
| *Step 2* |  |  |  |  |
| Age | .06 | .02 | 3.12 | .00 |
| Gender | -.22 | .12 | -1.88 | .06 |
| Race_US | .07 | .05 | 1.31 | .19 |
| Race_UK | -.06 | .08 | -.75 | .45 |
| Race_Ne | -.41 | .25 | -1.65 | .10 |
| Hispanic | -.11 | .14 | -.78 | .44 |
| School Year | .04 | .05 | .91 | .37 |
| *Step 3* |  |  |  |  |
| Age | .06 | .020 | 3.12 | .10 |
| Gender | -.22 | .116 | -1.86 | .01 |
| Race_US | .07 | .053 | 1.32 | .17 |
| Race_UK | -.06 | .080 | -.73 | .10 |
| Race_Ne | -.43 | .249 | -1.73 | .06 |
| Hispanic | -.11 | .136 | -.83 | .15 |
| School Year | .04 | .046 | .93 | .13 |
| Medical School | .00 | .005 | .63 | .01 |
| *Step 4* |  |  |  |  |
| Age | .054 | .020 | 2.67 | .01 |
| Gender | -.230 | .116 | -1.99 | .05 |
| Race_US | .063 | .052 | 1.20 | .23 |
| Race_UK | -.073 | .080 | -.92 | .36 |
| Race_Ne | -.138 | .273 | -.51 | .61 |
| Hispanic | -.129 | .136 | -.95 | .34 |
| School Year | .055 | .046 | 1.19 | .23 |
| Medical School | .002 | .005 | .37 | .71 |
| Country | -.192 | .075 | -2.57 | .01 |
